# Supplementary material for: Investigation of Heterochromatin Protein 1 Function in the Malaria Parasite Plasmodium falciparum Using a Conditional Domain Deletion and Swapping Approach
Source: PubMed Central journal article supplement (PMC7860992; doi:10.1128/msphere.01220-20), 2021-02-03
Supplement: mSphere.01220-20-st001.pdf [file mSphere.01220-20-st001.pdf]

**TABLE S1. Oligonucleotides used in this study.**

| Application                                 | Oligo name                                    | Sequence (5'-3')                                 |
|---------------------------------------------|-----------------------------------------------|--------------------------------------------------|
| PCR for the cloning of transfection vectors | <b>R1</b>                                     | ttaccatctccattgttcatttg                          |
|                                             | <b>F2</b>                                     | gtgaagaacacaaatattagaagaac                       |
|                                             | <b>R3</b>                                     | cagtgctagctgctgttctatatcttaattctg                |
|                                             | <b>F4</b>                                     | gaaacaaatggagatggtaaggaaacaccttgacaattatatac     |
|                                             | <b>R5</b>                                     | ctaataattgttctcaacacctacatttcaataactcgtac        |
|                                             | <b>F11</b>                                    | cagtgatccaaaaatgacaggtagtgatgaag                 |
|                                             | <b>R12</b>                                    | attcaaatgacctgtcttc                              |
|                                             | <b>F35</b>                                    | caaatgaaacaaatggagatggtaaaattatgaaaaaacaatgtacag |
|                                             | <b>R36</b>                                    | gttcttctaataattgttctcaaccattgggtgatgcatTTTTaag   |
|                                             | <b>F38</b>                                    | gaagaacaggctattgaaataaaaagtaaccatttAAAAA         |
|                                             | <b>R41</b>                                    | caatgCGCCGcaaccgttctatatctaagtcttg               |
|                                             | <b>R42</b>                                    | caatgCGCCGctgctgttctatatcttaattctg               |
|                                             | <b>F139</b>                                   | gtaataAAAAAataatatacaataac                       |
|                                             | <b>R143</b>                                   | ctaaaagaatataaaaataataaat                        |
|                                             | <b>R148</b>                                   | agggtatcacctcaaactgactcagcacgfgtctgtag           |
|                                             | <b>F158</b>                                   | cgttggccgattcattaatgaaggatattcagatgatgag         |
|                                             | <b>R159</b>                                   | gttattgtatatttttttacttactcgtgttctatatcttaac      |
|                                             | <b>F160</b>                                   | atattatataattatattcttttagaaaggctattcagatgatg     |
|                                             | <b>R161</b>                                   | gttcttcctttactcataaccgttctatatctaagtc            |
|                                             | <b>F162</b>                                   | atgagtaaggagaagaac                               |
|                                             | <b>R163</b>                                   | cctctcgctattacgccagggttaaaattctaaactatag         |
|                                             | <b>F164</b>                                   | atattatataattatattcttttagaaaggatagtgatgatga      |
|                                             | <b>R165</b>                                   | gttcttcctttactcattgctgttctatatcttaac             |
| <b>F177</b>                                 | atattatataattatattcttttagaaacaaatttcttatcaaag |                                                  |
| <b>R178</b>                                 | gttcttcctttactcatattcaaagacctgttcttc          |                                                  |
| <b>PCRA_F</b>                               | ctggcgtaatagcgaagagg                          |                                                  |
| <b>PCRA_R</b>                               | cattaatgaatcgccaacg                           |                                                  |
| Diagnostic PCR on gDNA                      | <b>F119</b>                                   | gtgtgtgttaagaaaaaatg                             |
|                                             | <b>R157</b>                                   | catgtagccaaaatgtg                                |
